# Supplementary material for: Improvements in Jump Height, Speed, and Quality of Life through an 8-Week Strength Program in Male Adolescents Soccer Players
Source: MDPI journal article supplement (doi:10.3390/sports12030067), 2024-02-23
Supplement: s1 [file s1]

**Table S1.** CONSORT 2010. Checklist of information to include when reporting a randomized clinical trial.

| Section/Topic                                 | Item No. | Checklist item                                                                                                                                                                                 | Reported on page No. |
|-----------------------------------------------|----------|------------------------------------------------------------------------------------------------------------------------------------------------------------------------------------------------|----------------------|
| <b>Title and summary</b>                      |          |                                                                                                                                                                                                |                      |
|                                               | 1a       | Identified as a randomized trial in the title.                                                                                                                                                 | p 1                  |
|                                               | 1b       | Structured summary of the trial design, methods, results and conclusions.                                                                                                                      | p 1                  |
| <b>Introduction Background and objectives</b> |          |                                                                                                                                                                                                |                      |
|                                               | 2a       | Scientific basis and explanation of the reasons                                                                                                                                                | p 1 and 2            |
|                                               | 2b       | Specific objectives or hypotheses                                                                                                                                                              | -                    |
| <b>Methods</b>                                |          |                                                                                                                                                                                                |                      |
| <b>Trial design</b>                           | 3a       | Description of the trial design (e.g., parallel, factorial), including allocation proportion                                                                                                   | p 2 and 3            |
|                                               | 3b       | Significant changes in methods after trial initiation (such as eligibility criteria), with reasons                                                                                             | -                    |
| <b>Participants</b>                           | 4a       | Criteria for selection of participants                                                                                                                                                         | p 3 and 4            |
|                                               | 4b       | Environments and data collection sites                                                                                                                                                         | p 4                  |
| <b>Interventions</b>                          | 5        | Interventions for each group with sufficient detail to allow for replication, including how and when they were actually administered                                                           | p 4 - 6              |
| <b>Results</b>                                | 6a       | Fully defined primary and secondary outcome measures, including how and when they were assessed                                                                                                | p 7 - 10             |
|                                               | 6b       | Any change in the results of the trial after the start of the trial, with reasons for the change.                                                                                              | -                    |
| <b>Sample size</b>                            | 7a       | How the sample size was determined                                                                                                                                                             | p 6                  |
|                                               | 7b       | Where appropriate, explanation of interim analysis and discontinuation guidelines                                                                                                              | -                    |
| <b>Randomization</b>                          |          |                                                                                                                                                                                                |                      |
| <b>Sequence generation</b>                    | 8a       | Method used to generate the randomization sequence                                                                                                                                             | -                    |
|                                               | 8b       | Type of randomization; details of any constraints (such as blocks and block size)                                                                                                              | -                    |
| <b>Allocation concealment mechanism</b>       | 9        | Mechanism used to implement the randomization sequence (such as sequentially numbered garbage cans), describing any measures taken to hide the sequence until the interventions were allocated | -                    |
| <b>Implementation</b>                         | 10       | Who generated the randomization sequence, who enrolled the participants and who assigned them to the interventions.                                                                            | -                    |
| <b>Masking</b>                                | 11a      | If so, who was blinded after assignment to the interventions (e.g., participants, health professionals, those assessing outcomes) and how?                                                     | -                    |
|                                               | 11b      | If applicable, description of the similarity of the interventions                                                                                                                              | -                    |

|                                                                    |     |                                                                                                                                                     |             |
|--------------------------------------------------------------------|-----|-----------------------------------------------------------------------------------------------------------------------------------------------------|-------------|
| <b>Statistical methods</b>                                         | 12a | Statistical methods used to compare primary and secondary outcome groups                                                                            | p 6         |
|                                                                    | 12b | Methods for additional analyses, such as subgroup analysis and adjusted analysis.                                                                   | -           |
| <b>Results</b>                                                     |     |                                                                                                                                                     |             |
| <b>Participant flow<br/>(a flow chart is strongly recommended)</b> | 13a | For each group, the number of participants who were randomly assigned, received the intended treatment, and were analyzed for the primary outcome.  | p 3         |
|                                                                    | 13b | For each group, the losses and exclusions after randomization, together with the reasons                                                            | p 3         |
| <b>Recruitment</b>                                                 | 14a | Dates defining recruitment and follow-up periods                                                                                                    | p 2         |
|                                                                    | 14b | Why the trial was terminated or interrupted                                                                                                         | -           |
| <b>Baseline data</b>                                               | 15  | A table showing demographic and clinical baseline characteristics for each group                                                                    | -           |
| <b>Numbers analyzed</b>                                            | 16  | For each group, number of participants (denominator) included in each analysis and whether the analysis was based on the initially assigned groups. | p 3         |
| <b>Results and estimation</b>                                      | 17a | For each primary and secondary outcome, the results for each group and the estimated effect size and precision (as the 95% confidence interval).    | p 7 - 11    |
|                                                                    | 17b | For binary results, the presentation of both absolute and relative effect sizes is recommended.                                                     | p 7 - 11    |
| <b>Secondary analysis</b>                                          | 18  | Results of any other analyses performed, including subgroup analyses and adjusted analyses, distinguishing pre-specified from exploratory analyses. | -           |
| <b>Damages</b>                                                     | 19  | All significant damages or undesirable effects in each group                                                                                        | -           |
| <b>Discussion</b>                                                  |     |                                                                                                                                                     |             |
| <b>Limitations</b>                                                 | 20  | Trial limitations, addressing sources of potential bias, imprecision, and, if relevant, multiplicity of analyses                                    | p 11 and 12 |
| <b>Generalization</b>                                              | 21  | Generalizability (external validity, applicability) of trial findings                                                                               | p 12        |
| <b>Interpretation</b>                                              | 22  | Interpretation consistent with the results, with balance of benefits and harms, and considering other relevant evidence.                            |             |
| <b>Other information</b>                                           |     |                                                                                                                                                     |             |
| <b>Registration</b>                                                | 23  | Registration number and name of the trial registration                                                                                              | -           |
| <b>Protocol</b>                                                    | 24  | Where to find the full trial protocol, if available                                                                                                 | -           |
| <b>Financing</b>                                                   | 25  | Sources of financing and other support (such as drug supply), role of funders                                                                       | -           |

*Note: own elaboration extracted from CONSORT 2010.*

**Table S2.** Academic results questionnaire.

|                                           |            |      |                      |             |
|-------------------------------------------|------------|------|----------------------|-------------|
| <b>Soccer player's name:</b>              |            |      |                      |             |
| <b>Team to which he belongs:</b>          |            |      |                      |             |
| Peloteros de la Sierra Sur Sports Club    |            |      | Gilena Football Club |             |
| <b>Spanish Language and Literature</b>    |            |      |                      |             |
| Insufficient                              | Sufficient | Well | Notable              | Outstanding |
| <b>Mathematics</b>                        |            |      |                      |             |
| Insufficient                              | Sufficient | Well | Notable              | Outstanding |
| <b>Geography and History</b>              |            |      |                      |             |
| Insufficient                              | Sufficient | Well | Notable              | Outstanding |
| <b>Physical Education</b>                 |            |      |                      |             |
| Insufficient                              | Sufficient | Well | Notable              | Outstanding |
| <b>Catholic Religion / Ethical Values</b> |            |      |                      |             |
| Insufficient                              | Sufficient | Well | Notable              | Outstanding |
| <b>Biology and Geology</b>                |            |      |                      |             |
| Insufficient                              | Sufficient | Well | Notable              | Outstanding |
| <b>French / Elective</b>                  |            |      |                      |             |
| Insufficient                              | Sufficient | Well | Notable              | Outstanding |
| <b>English</b>                            |            |      |                      |             |
| Insufficient                              | Sufficient | Well | Notable              | Outstanding |
| <b>Music</b>                              |            |      |                      |             |
| Insufficient                              | Sufficient | Well | Notable              | Outstanding |
| <b>Public Speaking and Debate</b>         |            |      |                      |             |
| Insufficient                              | Sufficient | Well | Notable              | Outstanding |

| Tutoring                                                                                                                                  |            |      |         |             |
|-------------------------------------------------------------------------------------------------------------------------------------------|------------|------|---------|-------------|
| Insufficient                                                                                                                              | Sufficient | Well | Notable | Outstanding |
| <p><b>In case you have taken any subject not mentioned in the questionnaire, please indicate it together with the grade obtained:</b></p> |            |      |         |             |

Questionnaire extracted from an article [23]; furthermore, it is similar to the one used in a scientific article [30]

**Table S3.** Health-related quality of life questionnaire.

|                                            |              |                      |               |        |
|--------------------------------------------|--------------|----------------------|---------------|--------|
| <b>Soccer player's name:</b>               |              |                      |               |        |
| <b>Team to which he belongs:</b>           |              |                      |               |        |
| Peloteros de la Sierra Sur Sports Club     |              | Gilena Football Club |               |        |
| <b>I have felt lonely.</b>                 |              |                      |               |        |
| Never                                      | Almost never | Sometimes            | Almost always | Always |
| <b>I have been bored out of my mind.</b>   |              |                      |               |        |
| Never                                      | Almost never | Sometimes            | Almost always | Always |
| <b>I felt different from the others.</b>   |              |                      |               |        |
| Never                                      | Almost never | Sometimes            | Almost always | Always |
| <b>I have felt afraid or insecure.</b>     |              |                      |               |        |
| Never                                      | Almost never | Sometimes            | Almost always | Always |
| <b>I have felt burdened by my parents.</b> |              |                      |               |        |
| Never                                      | Almost never | Sometimes            | Almost always | Always |

|                                                 |              |           |               |        |
|-------------------------------------------------|--------------|-----------|---------------|--------|
| <b>I liked myself.</b>                          |              |           |               |        |
| Never                                           | Almost never | Sometimes | Almost always | Always |
| <b>I have been proud of myself.</b>             |              |           |               |        |
| Never                                           | Almost never | Sometimes | Almost always | Always |
| <b>I felt good about myself.</b>                |              |           |               |        |
| Never                                           | Almost never | Sometimes | Almost always | Always |
| <b>I have been interested in the classes.</b>   |              |           |               |        |
| Never                                           | Almost never | Sometimes | Almost always | Always |
| <b>I have been able to do my homework well.</b> |              |           |               |        |
| Never                                           | Almost never | Sometimes | Almost always | Always |
| <b>I have had many good ideas.</b>              |              |           |               |        |
| Never                                           | Almost never | Sometimes | Almost always | Always |
| <b>I got along well with my friends.</b>        |              |           |               |        |
| Never                                           | Almost never | Sometimes | Almost always | Always |
| <b>I laughed and had a lot of fun.</b>          |              |           |               |        |
| Never                                           | Almost never | Sometimes | Almost always | Always |
| <b>The others liked me.</b>                     |              |           |               |        |
| Never                                           | Almost never | Sometimes | Almost always | Always |
| <b>I have had a lot of strength and energy.</b> |              |           |               |        |
| Never                                           | Almost never | Sometimes | Almost always | Always |
| <b>I got along well with my parents.</b>        |              |           |               |        |
| Never                                           | Almost never | Sometimes | Almost always | Always |
| <b>I have felt at home.</b>                     |              |           |               |        |
| Never                                           | Almost never | Sometimes | Almost always | Always |

|                                                 |              |           |               |        |
|-------------------------------------------------|--------------|-----------|---------------|--------|
| <b>We have had arguments or fights at home.</b> |              |           |               |        |
| Never                                           | Almost never | Sometimes | Almost always | Always |
| <b>I felt sick.</b>                             |              |           |               |        |
| Never                                           | Almost never | Sometimes | Almost always | Always |
| <b>It hurt a little.</b>                        |              |           |               |        |
| Never                                           | Almost never | Sometimes | Almost always | Always |
| <b>I have been very tired and exhausted.</b>    |              |           |               |        |
| Never                                           | Almost never | Sometimes | Almost always | Always |

Kiddo-Kindl questionnaire extracted from an article [31].
